# Supplementary material
Source: PubMed Central journal article supplement (PMC2629264)
Supplement: 0808725105_Appendix_PDF.pdf [file 0808725105_Appendix_PDF.pdf]

# Appendix A. Molecular Elements in the Model

Yaki Setty, Irun R. Cohen, Yuval Dor and David Harel

October 22, 2008

## Genes:

foxa2  
hes1  
ngn3  
ptf1  
hnf1 $\beta$   
hnf6  
hb9  
pdx1  
pbx1  
shh  
Ptc  
Delta  
Notch  
jagged  
rpb\_jk  
nueroD1  
Hes1  
*Pax4*  
*Pax6*  
*Nkx2.2*  
*Nkx6.1*  
*isl1*  
*DbpA*  
*Foxa1*  
*Brn4*  
*Lmx1.1*

## Receptors:

FGF2R  
ActR  
FGF10R  
BMP4R

## Factors:

FGF2 (specification)  
Activin $\beta$  (specification)  
FGF10 (proliferation, patterning and DN activation)  
BMP4 (proliferation and patterning)  
*isl1*

## Tissues:

Notochord (secretes FGF2 and Activin $\beta$ )  
Aorta and Blood Vessels (promote FGF10 and BMP4)  
Mesenchyme (enhances factors)

- Elements that are currently not yet implemented in the model are marked with italic typeface.
